# Supplementary material for: Enhancing electronic and optical properties of monolayer MoSe2via a MoSe2/blue phosphorene heterobilayer
Source: Royal Society of Chemistry journal article supplement (doi:10.1039/c9cp02743b), 2019-01-01
Supplement: c9cp02743b1.pdf [file c9cp02743b1.pdf]

## Supporting Information for

### Enhancing electronic and optical properties of monolayer MoSe<sub>2</sub> via MoSe<sub>2</sub>/Blue phosphorene heterobilayer

Huabing Shu,<sup>\*a</sup> Ying Wang<sup>a</sup> and Minglei Sun<sup>b</sup>

<sup>a</sup>School of Science, Jiangsu University of Science and Technology, Zhenjiang 212001, China

<sup>b</sup>School of Mechanical Engineering, Southeast University, Nanjing, 211189, China

\*E-mail: shuhuabing@just.edu.cn

**Table S1** Calculated structural parameters and bandgaps of the monolayers and heterobilayers: lattice constants ( $a/b$ ), bond lengths ( $l$ ), interlayer distances ( $d$ ), formation energies ( $E_f$ ), and bandgaps at DFT-PBE ( $E_{g-PBE}$ ) and  $G_0W_0$  ( $E_{g-G_0W_0}$ ) levels. “dir” and “ind” represent the direct and indirect of bandgap, respectively.

| Name                       | $a/b$<br>(Å) | $l_{P-P}$<br>(Å) | $l_{Mo-Se}$<br>(Å) | $d$<br>(Å) | $E_f$<br>(meV/unit) | $E_{g-PBE}$<br>(eV) | $E_{g-G_0W_0}$<br>(eV) |
|----------------------------|--------------|------------------|--------------------|------------|---------------------|---------------------|------------------------|
| MoSe <sub>2</sub>          | 3.322        | —                | 2.549              | —          | —                   | 1.44 <sup>dir</sup> | 2.30 <sup>dir</sup>    |
| Blue-P                     | 3.269        | 2.271            | —                  | —          | —                   | 1.92 <sup>ind</sup> | 3.35 <sup>ind</sup>    |
| AA-stacking                | 3.291        | 2.270            | 2.535              | 3.697      | -211.9              | 1.15 <sup>ind</sup> | 1.63 <sup>ind</sup>    |
| AB <sub>Mo</sub> -stacking | 3.294        | 2.270            | 2.537              | 3.852      | -185.4              | 1.12 <sup>ind</sup> | 1.59 <sup>ind</sup>    |
| AB <sub>Se</sub> -stacking | 3.288        | 2.269            | 2.535              | 3.809      | -190.7              | 1.12 <sup>ind</sup> | 1.58 <sup>ind</sup>    |

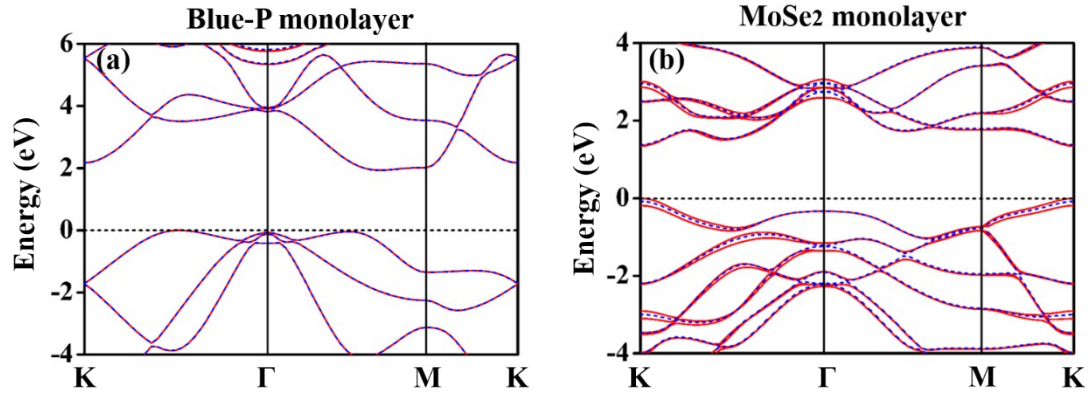

**Fig. S1** Calculated band structures of monolayers with (red solid line) and without (blue dashed line) the spin-orbit coupling included at the DFT-PBE level: (a) Blue-P, (b) MoSe<sub>2</sub>. The VBM is shifted to zero.

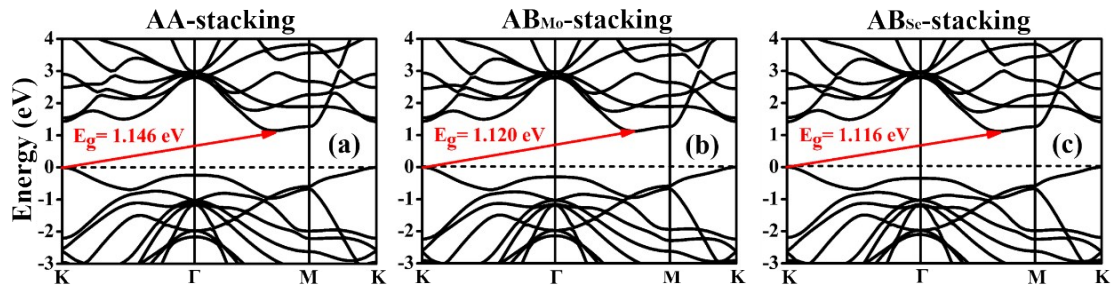

**Fig. S2** Calculated band structures of MoSe<sub>2</sub>/Blue-P heterobilayer at the DFT-PBE level: (a) AA-stacking, (b) AB<sub>Mo</sub>-stacking, and (c) AB<sub>Se</sub>-stacking. The VBM is shifted to zero.

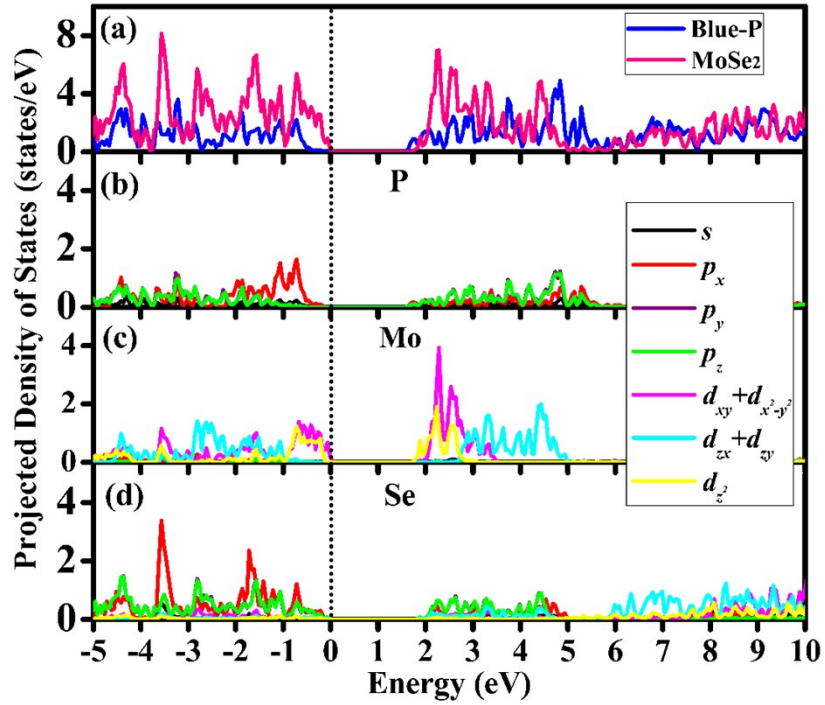

**Fig. S3** (a), (b), (c) Projected density of states of the MoSe<sub>2</sub>/Blue-P heterobilayer.

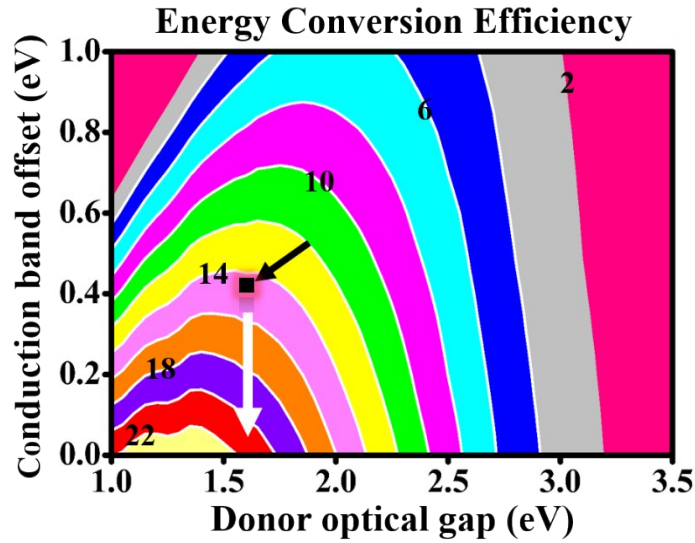

**Fig. S4** Calculated energy-conversion efficiency contour as a function of the donor optical gap (MoSe<sub>2</sub> layer) and conduction band offset in MoSe<sub>2</sub>/Blue-P heterobilayer. The white arrow indicates the trend of increase of energy-conversion efficiency through reducing the conduction band offset.
